# Supplementary material
Source: Springer Nature journal article supplement (https://www.springermedizin.de/resource/supplementary/12985_2008_474_MOESM3_ESM.pdf/9607830)
Supplement: MOESM3 [file 9607830]

A.

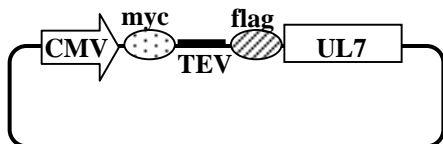

B.

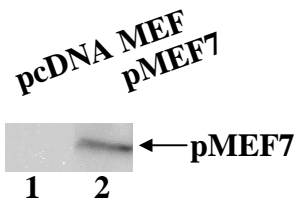

C.

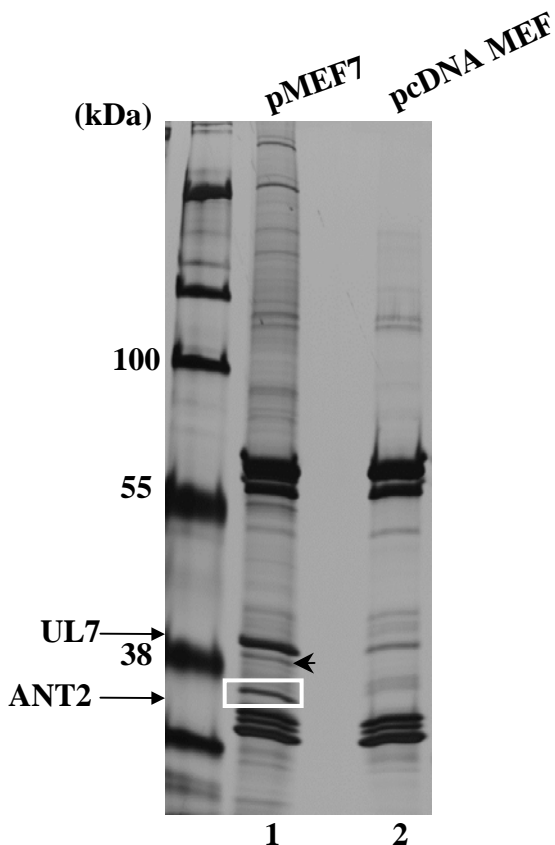

D.

MTDAAVSFAKDFLAGGVAAAISKTAVAPIER  
VKLLLVQVQHASKQITADKQYKGIIDCVVRIPK  
EQGVLSFWRGNLANVIRYFPTQALNFAFKDK  
YKQIFLGGVDKRTQFWRYFAGNLASGGAAG  
ATSLCFVYPLDFARTRLAADVGVKAGAEREFR  
GLGDCLVKIYKSDGIKGLYQGFNVSVQGIHY  
RAAYFGIYDTAKGMLPDPKNTHIVISWMIQ  
TVTAVAGLTSYPFDTVRRRMMMQSQRKGTD  
IMYTGTLDCWRKIARDEGGKAFFKGAWSNV  
LRGMGGAFVLVLYDEIKKYT
